# Supplementary material for: Branched ZnO nanotrees on flexible fiber-paper substrates for self-powered energy-harvesting systems
Source: Royal Society of Chemistry journal article supplement (doi:10.1039/c4ra09163a), 2014-12-06
Supplement: c4ra09163a1.pdf [file c4ra09163a1.pdf]

# Supporting Information

## Branched ZnO nanotrees on flexible fiber-paper substrates for self-powered energy-harvesting systems

Yu Qiu<sup>1,3</sup>, Dechao Yang<sup>2</sup>, Bing Yin<sup>1,3</sup>, Jixue Lei<sup>1,3</sup>, Heqiu Zhang<sup>1,3</sup>, Jiming Bian<sup>1</sup>, Yu  
Zhao<sup>1</sup>, Zhen Zhang<sup>1</sup>, Hui Chen<sup>4</sup>, Yapeng Li<sup>4</sup>, Lizhong Hu<sup>1,3,\*</sup>

<sup>1</sup> School of Physics and Optoelectronic Technology, Dalian University of Technology,  
Dalian 116024, People's Republic of China.

<sup>2</sup> Department of Electronic Engineering, Dalian Neusoft University of Information,  
Dalian, 116024, People's Republic of China

<sup>3</sup> The Key Laboratory for Micro/Nano Technology and System of Liaoning Province,  
Dalian University of Technology, Dalian 116024, People's Republic of China

<sup>4</sup> Faculty of Vehicle Engineering and Mechanics, Dalian University of Technology,  
Dalian 116024, People's Republic of China

\*Corresponding Author. E-mail: lizhongh@dlut.edu.cn

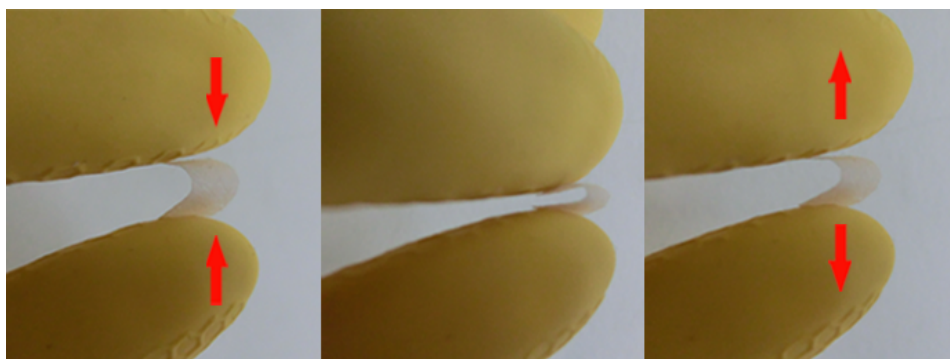

**Figure S1** Photographs of as-grown ZnO-paper when clenching and relaxing of the two fingers, indicating that the as-grown ZnO-paper can withstand dozens of bending cycles without any damage, which will benefit the stability of the flexible piezoelectric NGs.

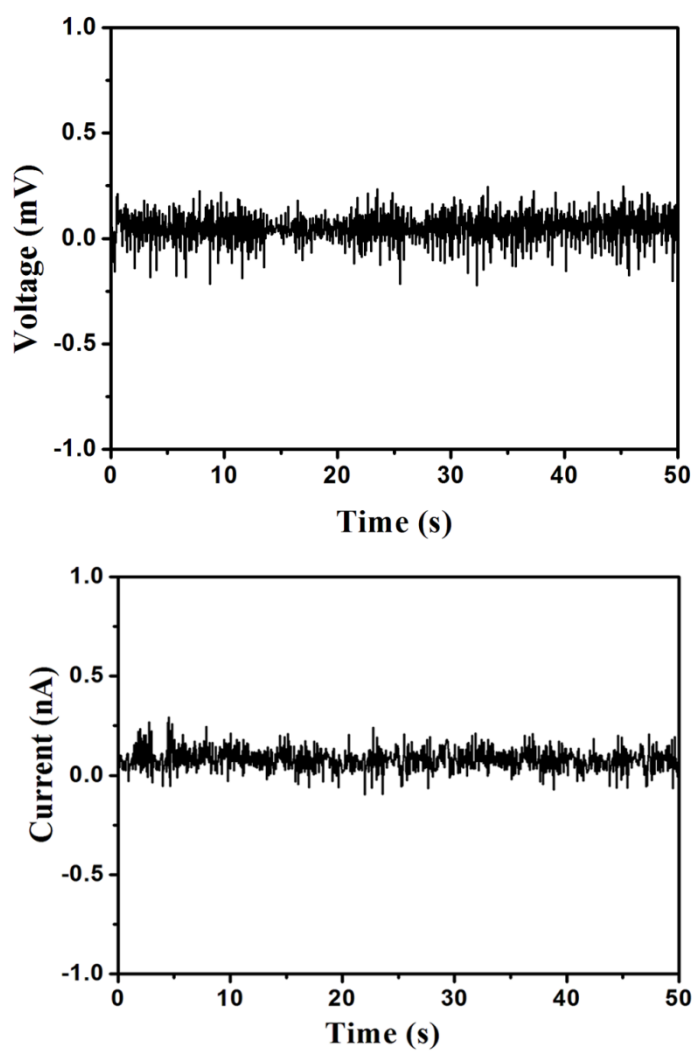

**Figure S2.** The electric outputs of a common paper under FS and FR, and no voltage or current was observed except of noise, confirming that the electric outputs of the fabricated NGs were generated from the piezoelectric ZnO NWs on the paper.
